# Supplementary material for: Multi-tissue Analysis of Co-expression Networks by Higher-Order Generalized Singular Value Decomposition Identifies Functionally Coherent Transcriptional Modules
Source: PLoS Genet. 2014 Jan 2;10(1):e1004006. doi: 10.1371/journal.pgen.1004006 (PMC3879165; doi:10.1371/journal.pgen.1004006)
Supplement: Table S2 — Functional annotation of co-expression clusters identified in rat. (XLSX) [file pgen.1004006.s006.xlsx]

## Sheet: functional annot. rat clusters 
Supporting Information Table S2
Cluster name	Tissues	Number of Probesets	Empirical p-value	Functional enrichment				Transcription Factor Enrichment
				Top 5 GO/KEGG Terms	p-value	FDR	Additional significant terms (FDR<5%)	TF	FDR
Rat Cluster 1	Skeletal muscle, left ventricle, aorta, liver	172	P<10-3	GO:0006457~protein folding	2.77378e-05	0.0441148		E2F-1	0.0199671
				GO:0051082~unfolded protein binding	9.11919e-05	0.121098		Elk-1	0.0199671
				GO:0031072~heat shock protein binding	0.00101089	1.33484		Pax-3	0.0288713
								CREB	0.0367261
								GABP	0.0367261
Rat Cluster 2	Skeletal muscle, left ventricle, aorta, liver	115	P<10-3	GO:0007507~heart development	0.000357404	0.554206		CAC-binding	2.0408e-05
				GO:0055007~cardiac muscle cell differentiation	0.00129045	1.9875		KROX	9.14126e-05
				GO:0048738~cardiac muscle tissue development	0.00161466	2.481		Churchill	0.00022822
				GO:0035051~cardiac cell differentiation	0.00211713	3.24125		EGR	0.00271659
								Pax-4	0.00784427
								AP-2gamma	0.0188788
								MTF-1	0.0188788
								Muscle	0.0298149
								Sp3	0.0339596
Rat Cluster 3	All 7 tissues	234	P<10-3	GO:0005739~mitochondrion	1.6795e-49	2.09987e-46	GO:0005740~mitochondrial envelope	c-Ets-1(p54)	8.69958e-06
				GO:0044429~mitochondrial part	5.55872e-19	6.95004e-16	rno00190:Oxidative phosphorylation	Nrf-1	0.000240499
				GO:0005840~ribosome	3.90286e-11	4.87972e-08	GO:0030529~ribonucleoprotein complex	Elk-1	0.000470308
				GO:0006412~translation	4.11693e-11	6.44712e-08	GO:0019866~organelle inner membrane	Elk-1	0.000470308
				GO:0005743~mitochondrial inner membrane	1.39286e-10	1.74148e-07	GO:0031966~mitochondrial membrane	SF-1	0.0005164
							GO:0003735~structural constituent of ribosome	NF-muE1	0.000604431
							GO:0007005~mitochondrion organization	NRF-2	0.000604431
							GO:0031980~mitochondrial lumen	YY1	0.000604431
							GO:0005759~mitochondrial matrix	STAT1	0.00138883
							rno05016:Huntington's disease	c-Ets-1(p54)	0.00138883
							GO:0000313~organellar ribosome	CDP	0.00216146
							GO:0005761~mitochondrial ribosome	ER	0.00566932
							GO:0031967~organelle envelope	GCNF	0.00600525
							GO:0031975~envelope	NF-Y	0.00977348
							rno05012:Parkinson's disease	BSAP	0.00977348
							rno05010:Alzheimer's disease	E4F1	0.00998995
							GO:0005198~structural molecule activity	myogenin	0.0150206
								E2F	0.0157106
								E2F	0.0157106
								COUP	0.016247
								GABP	0.016247
								ERR	0.016247
								SREBP-1	0.0233622
								E2F-4:DP-1	0.0277669
								USF	0.0298173
								E2F	0.0370063
								PPARG	0.0428201
								CCAAT	0.0473442
								Pax	0.0473442
								E2F-1	0.0473442
								E2F	0.0473442
								HIF-1	0.0473442
								c-Ets-1	0.0473442
Rat Cluster 4	All 7 tissues	89	P<10-3	GO:0006955~immune response	5.18337e-06	0.00821095	rno05020:Prion diseases	IRF	0.00292263
				GO:0002253~activation of immune response	5.49641e-06	0.00870681	GO:0002474~antigen processing and presentation of peptide antigen via MHC class I	ICSBP	0.00792763
				GO:0048584~positive regulation of response to stimulus	6.45516e-06	0.0102255	GO:0001817~regulation of cytokine production	ISRE	0.0362247
				GO:0002684~positive regulation of immune system process	6.45516e-06	0.0102255	rno04620:Toll-like receptor signaling pathway	IRF	0.0964216
				GO:0050778~positive regulation of immune response	8.90873e-06	0.0141119	GO:0002252~immune effector process
							GO:0001819~positive regulation of cytokine production
							GO:0048002~antigen processing and presentation of peptide antigen
							GO:0045087~innate immune response
							GO:0007243~protein kinase cascade
							rno04612:Antigen processing and presentation
							GO:0006508~proteolysis
							GO:0002757~immune response-activating signal transduction
							rno05220:Chronic myeloid leukemia
							GO:0002764~immune response-regulating signal transduction
							GO:0016064~immunoglobulin mediated immune response
Rat Cluster 5	All 7 tissues	406	P<10-3	GO:0006955~immune response	2.80625e-19	4.8382e-16	GO:0002684~positive regulation of immune system process	ISRE	9.81043e-12
				GO:0002252~immune effector process	1.35272e-09	2.33219e-06	GO:0002460~adaptive immune response based on somatic recombination of immune receptors built from immunoglobulin superfamily domains	ICSBP	5.94564e-10
				GO:0019882~antigen processing and presentation	9.94268e-09	1.7142e-05	GO:0002250~adaptive immune response	IRF	5.94564e-10
				GO:0002443~leukocyte mediated immunity	5.95902e-07	0.00102738	GO:0045321~leukocyte activation	IRF	8.169e-08
				GO:0002449~lymphocyte mediated immunity	6.20517e-07	0.00106982	GO:0002253~activation of immune response	IRF-7	1.40928e-05
							GO:0042612~MHC class I protein complex	Ets	0.000156865
							GO:0002274~myeloid leukocyte activation	IRF-1	0.00022253
							GO:0006952~defense response	NF-kappaB	0.00022253
							GO:0048002~antigen processing and presentation of peptide antigen	IRF-2	0.00149427
							rno04623:Cytosolic DNA-sensing pathway	c-Ets-1	0.0121305
							rno04612:Antigen processing and presentation	PPARalpha:RXR-alpha	0.0138143
							rno05332:Graft-versus-host disease	COUP-TF	0.0168881
								CACCC-binding	0.0172119
								VDR	0.0224128
								PAX6	0.0270841
								ELF-1	0.0284721
								Pax	0.0296926
								MAF	0.0296926
								NF-kappaB	0.0296926
								Muscle	0.0303763
								IRF1	0.0303763
								AHRHIF	0.0328183
								MYB	0.0418699
								NF-kappaB	0.0418699
								YY1	0.0418699
								MyoD	0.0418699
								Pax-2	0.0418699
								MYB	0.0418699
								ATF6	0.0427953
								AML1	0.0427953
Rat Cluster 6	Skeletal muscle, left ventricle, aorta, liver, fat	23	P<10-3					-	-
Rat Cluster 7	Liver	66	0.002	GO:0000166~nucleotide binding	0.00160999	1.67234	-	-	-
				rno04710:Circadian rhythm	0.00255023	2.96055
Rat Cluster 8	Skeletal muscle, left ventricle, liver, fat	54	P<10-3	GO:0042383~sarcolemma	8.22166e-06	0.00945167	-	MEF-2	0.0360886
				GO:0030315~T-tubule	0.00372968	4.2049
