# Supplementary material for: Multi-tissue Analysis of Co-expression Networks by Higher-Order Generalized Singular Value Decomposition Identifies Functionally Coherent Transcriptional Modules
Source: PLoS Genet. 2014 Jan 2;10(1):e1004006. doi: 10.1371/journal.pgen.1004006 (PMC3879165; doi:10.1371/journal.pgen.1004006)
Supplement: Table S3 — Disease Enrichment for rat cluster 1. R: Ratio of enrichment for disease associated genes, rawP: enrichment p-value from hypergeometric test, adjP: enrichment p-value adjusted for the multiple testing. (XLSX) [file pgen.1004006.s007.xlsx]

## Sheet: final_sig_geneset_file_13638102
Supporting Information Table S3
Disease 1	Shock
Stats	R=19.55	rawP=2.43e-16	adjP=5.25e-14
	Gene Symbol	ENSEMBL Gene ID	Description
1	MAPKAPK2	ENSG00000162889	mitogen-activated protein kinase-activated protein kinase 2
2	HSPH1	ENSG00000120694	heat shock 105kDa/110kDa protein 1
3	BAG3	ENSG00000151929	BCL2-associated athanogene 3
4	STIP1	ENSG00000168439	stress-induced-phosphoprotein 1
5	HSP90B1	ENSG00000166598	heat shock protein 90kDa beta (Grp94), member 1
6	CRYAB	ENSG00000109846	crystallin, alpha B
7	DNAJB2	ENSG00000135924	DnaJ (Hsp40) homolog, subfamily B, member 2
8	CHORDC1	ENSG00000110172	cysteine and histidine-rich domain (CHORD) containing 1
9	HSPA5	ENSG00000044574	heat shock 70kDa protein 5 (glucose-regulated protein, 78kDa)
10	HSPB8	ENSG00000152137	heat shock 22kDa protein 8
11	HSF1	ENSG00000185122	heat shock transcription factor 1
12	FKBP5	ENSG00000096060	FK506 binding protein 5
13	DNAJB1	ENSG00000132002	DnaJ (Hsp40) homolog, subfamily B, member 1
14	DNAJA1	ENSG00000086061	DnaJ (Hsp40) homolog, subfamily A, member 1
15	DNAJB5	ENSG00000137094	DnaJ (Hsp40) homolog, subfamily B, member 5
16	MAP2K3	ENSG00000034152	mitogen-activated protein kinase kinase 3
Disease 2	Stress
Stats	R=11.33	rawP=5.81e-12	adjP=6.27e-10
	Gene Symbol	ENSEMBL Gene ID	Description
1	MAPKAPK2	ENSG00000162889	mitogen-activated protein kinase-activated protein kinase 2
2	HSPH1	ENSG00000120694	heat shock 105kDa/110kDa protein 1
3	BAG3	ENSG00000151929	BCL2-associated athanogene 3
4	STIP1	ENSG00000168439	stress-induced-phosphoprotein 1
5	HSP90B1	ENSG00000166598	heat shock protein 90kDa beta (Grp94), member 1
6	CRYAB	ENSG00000109846	crystallin, alpha B
7	SDC4	ENSG00000124145	syndecan 4
8	HSPA5	ENSG00000044574	heat shock 70kDa protein 5 (glucose-regulated protein, 78kDa)
9	HSF1	ENSG00000185122	heat shock transcription factor 1
10	MYH9	ENSG00000100345	myosin, heavy chain 9, non-muscle
11	RCAN1	ENSG00000159200	regulator of calcineurin 1
12	FKBP5	ENSG00000096060	FK506 binding protein 5
13	DNAJB1	ENSG00000132002	DnaJ (Hsp40) homolog, subfamily B, member 1
14	MANF	ENSG00000145050	mesencephalic astrocyte-derived neurotrophic factor
15	MAP2K3	ENSG00000034152	mitogen-activated protein kinase kinase 3
Disease 3	Cardiomyopathy, Dilated
Stats	R=17.53	rawP=8.43e-05	adjP=0.0046
	Gene Symbol	ENSEMBL Gene ID	Description
1	BAG3	ENSG00000151929	BCL2-associated athanogene 3
2	EMD	ENSG00000102119	emerin
3	ATP2A2	ENSG00000174437	ATPase, Ca++ transporting, cardiac muscle, slow twitch 2
4	CRYAB	ENSG00000109846	crystallin, alpha B
Disease 4	Hypertrophy
Stats	R=11.93	rawP=6.72e-05	adjP=0.0046
	Gene Symbol	ENSEMBL Gene ID	Description
1	RCAN1	ENSG00000159200	regulator of calcineurin 1
2	CAMTA2	ENSG00000108509	calmodulin binding transcription activator 2
3	ATP2A2	ENSG00000174437	ATPase, Ca++ transporting, cardiac muscle, slow twitch 2
4	CTGF	ENSG00000118523	connective tissue growth factor
5	HSPB8	ENSG00000152137	heat shock 22kDa protein 8
Disease 5	Shock, Surgical
Stats	R=27.68	rawP=0.0002	adjP=0.0072
	Gene Symbol	ENSEMBL Gene ID	Description
1	CRYAB	ENSG00000109846	crystallin, alpha B
2	HSPA5	ENSG00000044574	heat shock 70kDa protein 5 (glucose-regulated protein, 78kDa)
3	HSPB8	ENSG00000152137	heat shock 22kDa protein 8
Disease 6	Heat Stress Disorders
Stats	R=26.97	rawP=0.0002	adjP=0.0072
	Gene Symbol	ENSEMBL Gene ID	Description
1	DNAJB1	ENSG00000132002	DnaJ (Hsp40) homolog, subfamily B, member 1
2	UBE2G2	ENSG00000184787	ubiquitin-conjugating enzyme E2G 2
3	HSPA5	ENSG00000044574	heat shock 70kDa protein 5 (glucose-regulated protein, 78kDa)
Disease 7	Encephalitis, Japanese
Stats	R=63.75	rawP=0.0004	adjP=0.0079
	Gene Symbol	ENSEMBL Gene ID	Description
1	DNAJA1	ENSG00000086061	DnaJ (Hsp40) homolog, subfamily A, member 1
2	DDX42	ENSG00000198231	DEAD (Asp-Glu-Ala-Asp) box polypeptide 42
Disease 8	Cardiomegaly
Stats	R=11.69	rawP=0.0004	adjP=0.0079
	Gene Symbol	ENSEMBL Gene ID	Description
1	BAG3	ENSG00000151929	BCL2-associated athanogene 3
2	CAMTA2	ENSG00000108509	calmodulin binding transcription activator 2
3	ATP2A2	ENSG00000174437	ATPase, Ca++ transporting, cardiac muscle, slow twitch 2
4	CRYAB	ENSG00000109846	crystallin, alpha B
Disease 9	Cardiomyopathies
Stats	R=12.52	rawP=0.0003	adjP=0.0079
	Gene Symbol	ENSEMBL Gene ID	Description
1	BAG3	ENSG00000151929	BCL2-associated athanogene 3
2	EMD	ENSG00000102119	emerin
3	ATP2A2	ENSG00000174437	ATPase, Ca++ transporting, cardiac muscle, slow twitch 2
3	CRYAB	ENSG00000109846	crystallin, alpha B
Disease 10	Cardio-facio-cutaneous Syndrome
Stats	R=63.75	rawP=0.0004	adjP=0.0079
	Gene Symbol	ENSEMBL Gene ID	Description
1	KRAS	ENSG00000133703	v-Ki-ras2 Kirsten rat sarcoma viral oncogene homolog
2	PTPN1	ENSG00000196396	protein tyrosine phosphatase, non-receptor type 1

## Sheet: Sheet1
Shock	16	9261 10963 9531 10808 7184 1410 3300 3309 26973 3297 26353 2289 3301 3337 25822 5606	C=287	O=16	E=0.82	R=19.55	rawP=2.43e-16	adjP	Shock	13.2798	5.25e-14
Stress	15	9261 10963 9531 10808 7184 1410 3309 6385 3297 4627 2289 1827 7873 3337 5606	C=464	O=15	E=1.32	R=11.33	rawP=5.81e-12	adjP	Stress	9.20273	6.27e-10
Cardiomyopathy, Dilated	4	9531 488 2010 1410	C=80	O=4	E=0.23	R=17.53	rawP=8.43e-05	adjP	Cardiomyopathy, Dilated	2.33724	0.0046
Hypertrophy	5	1490 488 23125 26353 1827	C=147	O=5	E=0.42	R=11.93	rawP=6.72e-05	adjP	Hypertrophy	2.33724	0.0046
Shock, Surgical	3	1410 3309 26353	C=38	O=3	E=0.11	R=27.68	rawP=0.0002	adjP	Shock, Surgical	2.14267	0.0072
Heat Stress Disorders	3	3309 3337 7327	C=39	O=3	E=0.11	R=26.97	rawP=0.0002	adjP	Heat Stress Disorders	2.14267	0.0072
Encephalitis, Japanese	2	3301 11325	C=11	O=2	E=0.03	R=63.75	rawP=0.0004	adjP	Encephalitis, Japanese	2.10237	0.0079
Cardiomegaly	4	9531 488 23125 1410	C=120	O=4	E=0.34	R=11.69	rawP=0.0004	adjP	Cardiomegaly	2.10237	0.0079
Cardiomyopathies	4	9531 488 2010 1410	C=112	O=4	E=0.32	R=12.52	rawP=0.0003	adjP	Cardiomyopathies	2.10237	0.0079
Cardio-facio-cutaneous Syndrome	2	5770 3845	C=11	O=2	E=0.03	R=63.75	rawP=0.0004	adjP	Cardio-facio-cutaneous Syndrome	2.10237	0.0079
